# Supplementary material
Source: ML conference proceedings conference paper supplement (https://openreview.net/forum?id=4UCktT9XZx)
Supplement: supplementary_material [file attachment]

## Sheet: Information
Species	General Name
Tabula Sapiens	Human
Tabula Microcebus	Lemur
Tabula Muris	Mouse
If there are no species annotation, all of the datasets in that modality are from Human.

## Sheet: scrna_heart
Tabula Sapiens
datasets	nodes	edges
D4	1000	790658
H2	1000	611364
H3	1000	709450
D6	1000	811512
D2	1000	823822
H7	1000	728562
D11	1000	600790
D3	1000	630958
D1	1000	727200
D5	1000	703614
H4	1000	663226
D7	1000	775426
H6	1000	661468
H5	1000	718212
G19	1000	446166
Tabula Microcebus
datasets	nodes	edges
L2	1000	41868
L3	1000	19556
L4	1000	57154
Tabula Muris
datasets	nodes	edges
P7	1000	292404

## Sheet: scatac_heart
datasets	nodes	edges
674	1000	10356
328	1000	8110
864	1000	7218
b1	1000	719034
b2	1000	451418

## Sheet: spatial_heart
datasets	nodes	edges
visiumse	1000	135106

## Sheet: scrna_lung
Tabula Sapiens
datasets	nodes	edges
BAL034	1000	418868
A44-LNG-2-SC-45N-1	1000	240466
ND17494	1000	194910
BAL027	1000	300024
BT1294	1000	259926
Tabula Microcebus
datasets	nodes	edges
L1	1000	283750
L2	1000	336236
L3	1000	394550
L4	1000	719052

## Sheet: scatac_lung
datasets	nodes	edges
b1	1000	373722

## Sheet: scrna_kidney
Tabula Sapiens
datasets	nodes	edges
b1	1000	682006
b2	1000	622242
Tabula Microcebus
datasets	nodes	edges
L2	1000	136564
L3	1000	484546
L4	1000	225934
Tabula Muris
datasets	nodes	edges
P7	1000	381904

## Sheet: scatac_kidney
datasets	nodes	edges
b1	1000	506598
243	1000	23226

## Sheet: scrna_liver
Tabula Sapiens
datasets	nodes	edges
A31	1000	310404
A29	1000	281232
A35	1000	120676
A36	1000	199894
A52	1000	394686
640C	1000	423782
637C	1000	396626
Tabula Microcebus
datasets	nodes	edges
L2	1000	457410
L3	1000	372218
Tabula Muris
datasets	nodes	edges
P7	1000	305594

## Sheet: scatac_liver
datasets	nodes	edges
b1	1000	491630

[truncated: 13 more sheets: scrna_thymus, scatac_thymus, scrna_pbmc, scrna_pancreas, scatac_pancreas, scrna_spleen, scatac_spleen, scrna_cerebellum, scatac_cerebellum, scrna_cerebrum, scatac_cerebrum, spatial_cerebrum, lung cancer]
