# Supplementary material
Source: ML conference proceedings conference paper supplement (https://openreview.net/forum?id=4UCktT9XZx)
Supplement: supplementary_material [file attachment]

Table1: Human data

| Tissue                                                                         | Datatype                   | Link                                                                                                                                                                                                                                                                                                                                                                                                                                                                                                                                                                                                                                                                                                                                                     |
|--------------------------------------------------------------------------------|----------------------------|----------------------------------------------------------------------------------------------------------------------------------------------------------------------------------------------------------------------------------------------------------------------------------------------------------------------------------------------------------------------------------------------------------------------------------------------------------------------------------------------------------------------------------------------------------------------------------------------------------------------------------------------------------------------------------------------------------------------------------------------------------|
| Heart                                                                          | scRNA-seq                  | <a href="https://www.heartcellatlas.org/">https://www.heartcellatlas.org/</a><br><a href="https://data.mendeley.com/datasets/mbvhhf8m62/2">https://data.mendeley.com/datasets/mbvhhf8m62/2</a>                                                                                                                                                                                                                                                                                                                                                                                                                                                                                                                                                           |
| Lung                                                                           | scRNA-seq                  | <a href="https://beta.fastgenomics.org/datasets/detail-dataset-427f1eee6dd44f50bae1ab13f0f3c6a9">https://beta.fastgenomics.org/datasets/detail-dataset-427f1eee6dd44f50bae1ab13f0f3c6a9</a>                                                                                                                                                                                                                                                                                                                                                                                                                                                                                                                                                              |
| Kidney                                                                         | scRNA-seq                  | <a href="https://www.kidneycellatlas.org/">https://www.kidneycellatlas.org/</a>                                                                                                                                                                                                                                                                                                                                                                                                                                                                                                                                                                                                                                                                          |
| Liver,<br>Thymus,<br>Spleen                                                    | scRNA-seq                  | <a href="https://singlecell.broadinstitute.org/single_cell/study/SCP1845/cross-tissue-immune-cell-analysis-reveals-tissue-specific-features-in-humans?scpbr=human-cell-atlas-main-collection#study-download">https://singlecell.broadinstitute.org/single_cell/study/SCP1845/cross-tissue-immune-cell-analysis-reveals-tissue-specific-features-in-humans?scpbr=human-cell-atlas-main-collection#study-download</a><br><a href="https://descartes.brotmanbaty.org/bbi/human-gene-expression-during-development/">https://descartes.brotmanbaty.org/bbi/human-gene-expression-during-development/</a>                                                                                                                                                     |
| Cerebrum,<br>Cerebellum                                                        | scRNA-seq                  | <a href="https://descartes.brotmanbaty.org/bbi/human-gene-expression-during-development">https://descartes.brotmanbaty.org/bbi/human-gene-expression-during-development</a>                                                                                                                                                                                                                                                                                                                                                                                                                                                                                                                                                                              |
| PBMC (with<br>COVID)                                                           | scRNA-seq                  | <a href="https://www.covid19cellatlas.org/index.patient.html">https://www.covid19cellatlas.org/index.patient.html</a> PBMCs                                                                                                                                                                                                                                                                                                                                                                                                                                                                                                                                                                                                                              |
| Lung (with<br>Cancer)                                                          | scRNA-seq                  | <a href="https://www.ncbi.nlm.nih.gov/geo/query/acc.cgi?acc=GSE196303">https://www.ncbi.nlm.nih.gov/geo/query/acc.cgi?acc=GSE196303</a>                                                                                                                                                                                                                                                                                                                                                                                                                                                                                                                                                                                                                  |
| Pancreas                                                                       | scRNA-seq                  | <a href="https://azimuth.hubmapconsortium.org/references/#Human%20-%20Pancreas">https://azimuth.hubmapconsortium.org/references/#Human%20-%20Pancreas</a>                                                                                                                                                                                                                                                                                                                                                                                                                                                                                                                                                                                                |
| Heart                                                                          | scATAC-seq                 | <a href="https://portal.hubmapconsortium.org/browse/dataset/ba41e71358136f6a202114681a217a95">https://portal.hubmapconsortium.org/browse/dataset/ba41e71358136f6a202114681a217a95</a><br><a href="https://portal.hubmapconsortium.org/browse/dataset/d180976b42a9ed8b5fb12a508f79a238">https://portal.hubmapconsortium.org/browse/dataset/d180976b42a9ed8b5fb12a508f79a238</a><br><a href="https://portal.hubmapconsortium.org/browse/dataset/d39a1b1f40bbab8990078d343b332cdc">https://portal.hubmapconsortium.org/browse/dataset/d39a1b1f40bbab8990078d343b332cdc</a><br><a href="https://descartes.brotmanbaty.org/bbi/human-gene-expression-during-development/">https://descartes.brotmanbaty.org/bbi/human-gene-expression-during-development/</a> |
| Lung,<br>Kidney,<br>Thymus,<br>Spleen,<br>Cerebrum,<br>Cerebellum,<br>Pancreas | scATAC-seq                 | <a href="https://descartes.brotmanbaty.org/bbi/human-gene-expression-during-development/">https://descartes.brotmanbaty.org/bbi/human-gene-expression-during-development/</a>                                                                                                                                                                                                                                                                                                                                                                                                                                                                                                                                                                            |
| Heart                                                                          | Spatial<br>Transcriptomics | <a href="https://support.10xgenomics.com/spatial-gene-expression/datasets/1.1.0/V1_Human_Heart">https://support.10xgenomics.com/spatial-gene-expression/datasets/1.1.0/V1_Human_Heart</a>                                                                                                                                                                                                                                                                                                                                                                                                                                                                                                                                                                |
| Cerebrum                                                                       | Spatial<br>Transcriptomics | <a href="https://www.ncbi.nlm.nih.gov/geo/query/acc.cgi?acc=GSE205055">https://www.ncbi.nlm.nih.gov/geo/query/acc.cgi?acc=GSE205055</a>                                                                                                                                                                                                                                                                                                                                                                                                                                                                                                                                                                                                                  |

Table2: Mouse and Lemur data

| Tissue                                              | Datatype  | Link                                                                                                                                                                                                                                                                                                                                                                                                                   |
|-----------------------------------------------------|-----------|------------------------------------------------------------------------------------------------------------------------------------------------------------------------------------------------------------------------------------------------------------------------------------------------------------------------------------------------------------------------------------------------------------------------|
| Heart, Lung,<br>Kidney, Liver,<br>Thymus,<br>Spleen | scRNA-seq | <a href="https://figshare.com/articles/dataset/Tabula_Microcebus_v1_0/14468196?file=31777475">https://figshare.com/articles/dataset/Tabula_Microcebus_v1_0/14468196?file=31777475</a><br><a href="https://figshare.com/articles/dataset/Single-cell_RNA-seq_data_from_microfluidic_emulsion_v2_/5968960/2">https://figshare.com/articles/dataset/Single-cell_RNA-seq_data_from_microfluidic_emulsion_v2_/5968960/2</a> |
